# Supplementary material for: Characteristics and management of adolescents attending the ED with fever: a prospective multicentre study
Source: HighWire-hosted journal article supplement (doi:10.1136/bmjopen-2021-053451), 2022-01-01
Supplement: bmjopen-2021-053451supp002_data_supplement.pdf [file bmjopen-2021-053451supp002_data_supplement.pdf]

**Appendix 2: Participating EDs**

| Hospital                               | Country, city                       | Hospital type | Total annual paediatric ED visits | Total period of inclusion   | Period of inclusion per month | Number of patients included |
|----------------------------------------|-------------------------------------|---------------|-----------------------------------|-----------------------------|-------------------------------|-----------------------------|
| Medizinische Universität Graz          | Austria, Graz                       | University    | 10,000-30,000                     | 1-1-2017<br>–<br>31-12-2018 | 10 days                       | 2243                        |
| Dr. von Hauner Children's Hospital     | Germany, Munich                     | Teaching      | 10,000-30,000                     | 1-1-2017<br>–<br>31-12-2018 | 1 week                        | 1175                        |
| P. and A. Kyriakou Children's Hospital | Greece, Athens                      | University    | >30,000                           | 1-1-2017<br>–<br>1-5-2018   | 1-2 weeks                     | 4549                        |
| Children clinical university hospital  | Latvia, Riga                        | Teaching      | >30,000                           | 1-1-2017<br>–<br>31-12-2018 | All                           | 9000                        |
| Univerzitetni Klinični Center          | Slovenia, Ljubljana                 | University    | <10,000                           | 1-1-2017<br>–<br>31-12-2018 | All                           | 3659                        |
| Hospital Clínico Universitario         | Spain, Santiago de Compostela       | University    | >30,000                           | 1-1-2017<br>–<br>1-5-2018   | 1-2 weeks                     | 3877                        |
| Erasmus MC-Sophia Children's Hospital  | The Netherlands, Rotterdam          | University    | <10,000                           | 1-1-2017<br>–<br>1-4-2018   | All                           | 1681                        |
| RadboudUMC                             | The Netherlands, Nijmegen           | University    | <10,000                           | 1-1-2017<br>–<br>1-4-2018   | All                           | 676                         |
| Canisius Wilhelmina Ziekenhuis         | The Netherlands, Nijmegen           | Teaching      | <10,000                           | 1-1-2017<br>–<br>31-12-2018 | 2 weeks                       | 415                         |
| Alder Hey Children's Hospital          | United Kingdom, Liverpool           | Teaching      | >30,000                           | 1-1-2017<br>–<br>31-12-2018 | 1 week                        | 1624                        |
| St. Mary's Hospital                    | United Kingdom, London              | University    | 10,000-30,000                     | 1-1-2017<br>–<br>31-12-2018 | All                           | 5714                        |
| Great North Children's Hospital        | United Kingdom, Newcastle upon Tyne | University    | >30,000                           | 1-4-2017<br>–<br>1-4-2018   | 2 weeks                       | 3870                        |
