# Supplementary material for: Characteristics and management of adolescents attending the ED with fever: a prospective multicentre study
Source: HighWire-hosted journal article supplement (doi:10.1136/bmjopen-2021-053451), 2022-01-01

## Presumed cause of infection: categorisation based on clinical data

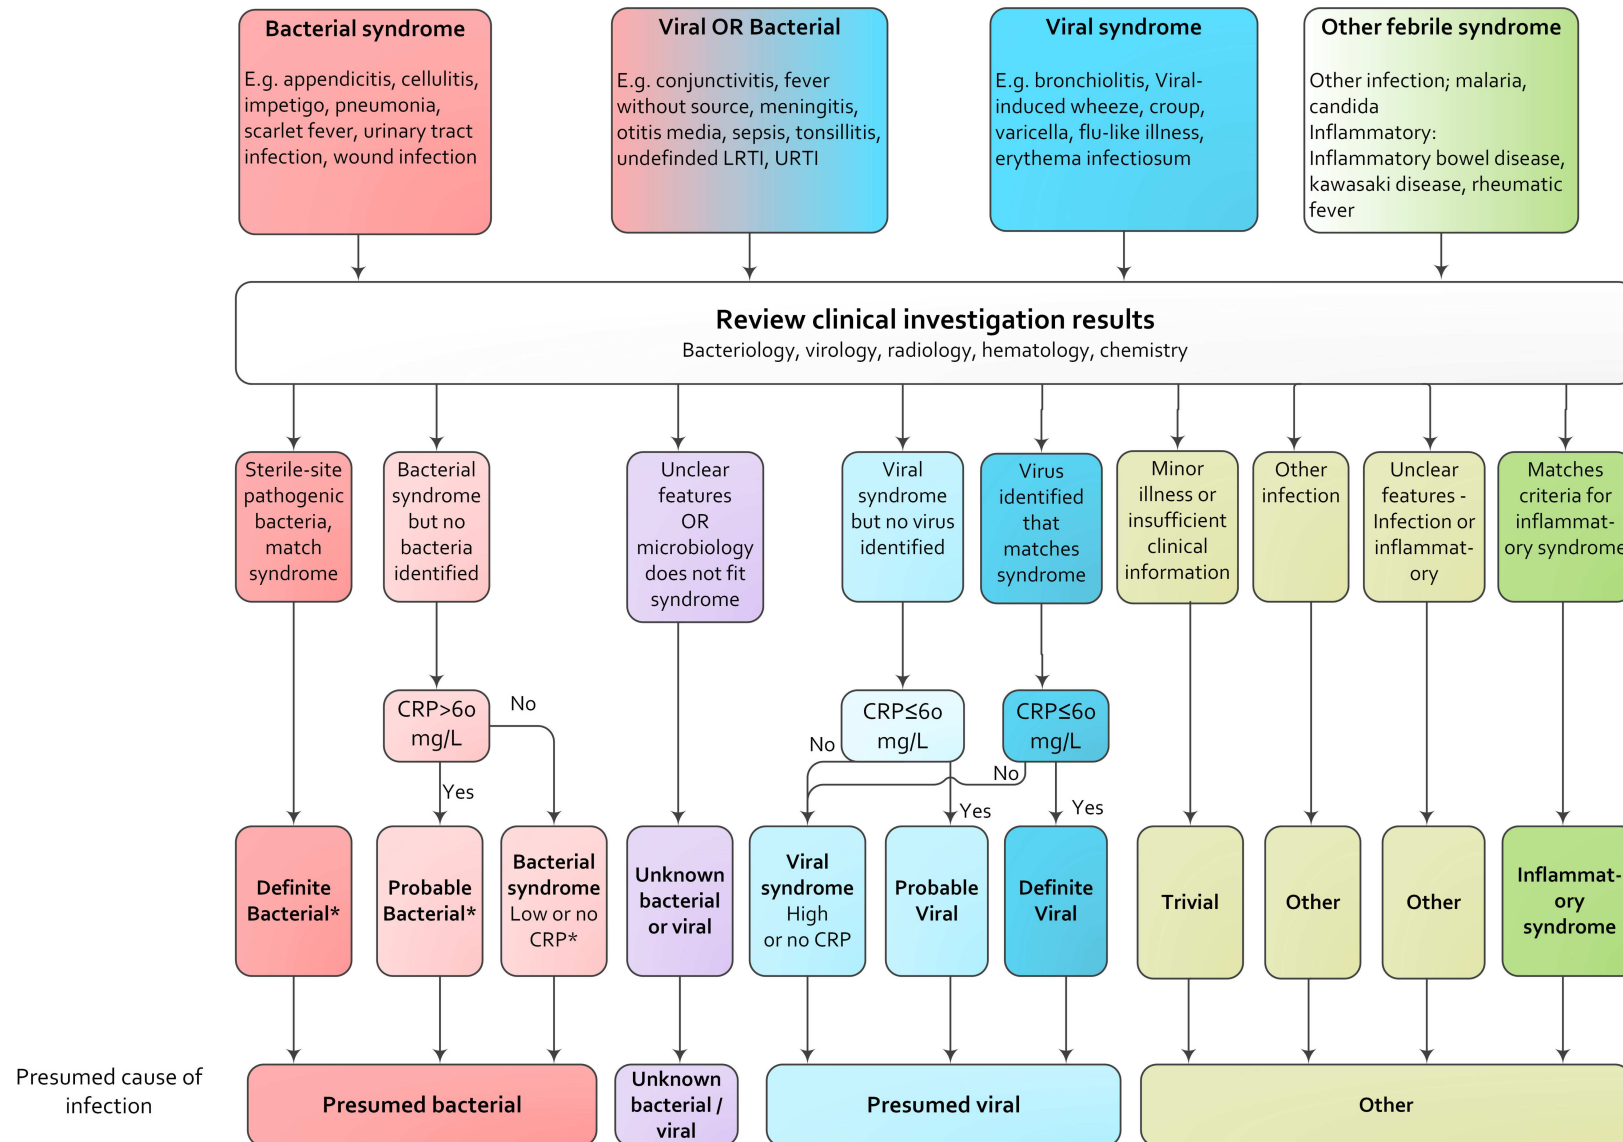

Supplement: bmjopen-2021-053451supp004_data_supplement.pdf [file bmjopen-2021-053451supp004_data_supplement.pdf]
