# Supplementary material for: Characteristics and management of adolescents attending the ED with fever: a prospective multicentre study
Source: BMJ Open. 2022 Jan 19;12(1):e053451. doi: 10.1136/bmjopen-2021-053451 (PMC8772429; doi:10.1136/bmjopen-2021-053451)
Supplement: Supplementary data [file bmjopen-2021-053451supp006.pdf]

## Appendix 6: Differences in patient characteristics between young children and adolescents with a final diagnosis of SBI.<sup>a</sup>

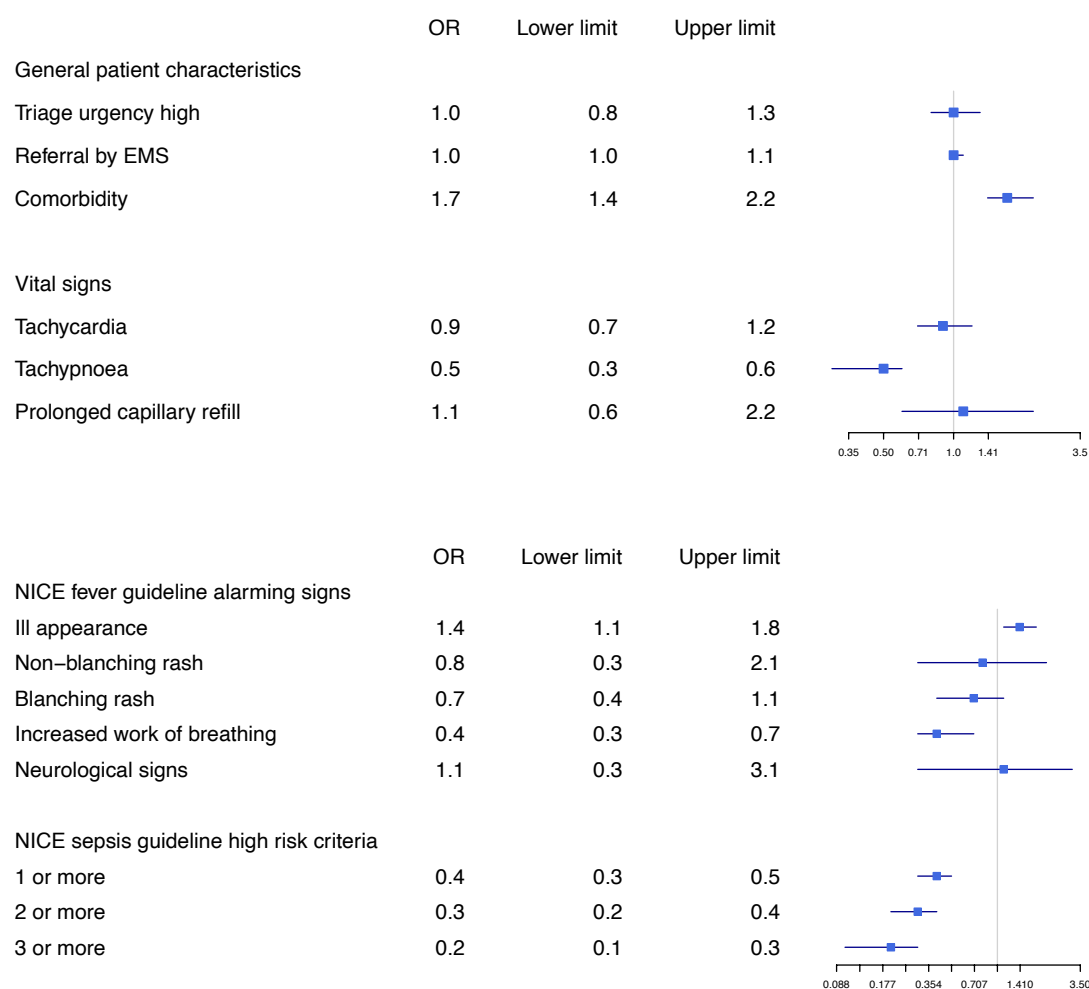

<sup>a</sup> Younger children used as reference. Adjusted for hospital, sex, duration of fever, previous medical care, time of arrival and comorbidity. \* According to APLS cut-off values by age.
